# Supplementary material for: Clinical relevance of TP53 hotspot mutations in high-grade serous ovarian cancers
Source: PubMed Central journal article supplement (PMC7000721; doi:10.1038/s41416-019-0654-8), 2019-11-29
Supplement: 41416_2019_654_MOESM1_ESM.pdf [file 41416_2019_654_MOESM1_ESM.pdf]

**Supplementary Table Legends:**

**Supplementary Table S1.** Detailed information about samples used in this study.

**Supplementary Table S2.** Patient demographics are used in survival analysis.

**Supplementary Table S3.** Univariate OS and RFS analyses of type of *TP53* mutations in training, validation and combined sets of HGSOc.

**Supplementary Table S4.** Univariate OS and RFS analyses of *TP53* hotspot mutations in combined set of HGSOc.

**Supplementary Table S5.** Differentially expressed proteins between hotspot mutations.

**Supplementary Figure legend:**

**Supplementary Figure S1.** Kaplan-Meier plot of overall survival probability for patients with all *TP53* hotspot mutations.

Supplementary Table S1. High-grade serous ovarian cancer samples used in this study

| TP53 mutation and clinical data | Sample size | Ref                                                                    |
|---------------------------------|-------------|------------------------------------------------------------------------|
| TCGA                            | 468         | <sup>1</sup> , <a href="http://Xena.ucsc.edu">http://Xena.ucsc.edu</a> |
| Ahmed et al                     | 118         | <sup>2</sup>                                                           |
| Patch et al                     | 12          | <sup>3-5</sup>                                                         |
| Emanuel et al Garsed et al      | 12          | <sup>4, 6-8</sup>                                                      |
| Hayano et al                    | 13          | <sup>9</sup>                                                           |
| Chien et al                     | 15          | <sup>10</sup>                                                          |
| Beltrame et al                  | 7           | <sup>11</sup>                                                          |
| Schwarz et al                   | 15          | <sup>12</sup>                                                          |
| Wojnarowich et al               | 81          | <sup>13</sup>                                                          |
| Jean et al                      | 52          | <sup>14</sup>                                                          |

References:

1. The Cancer Genome Atlas Network. Integrated genomic analyses of ovarian carcinoma. *Nature* 2011, 474, 609-15.
2. Ahmed AA, Etemadmoghadam D, Temple J, et al. Driver mutations in TP53 are ubiquitous in high grade serous carcinoma of the ovary. *J Pathol* 2010, 221, 49-56.
3. Patch AM, Christie EL, Etemadmoghadam D, et al. Whole-genome characterization of chemoresistant ovarian cancer. *Nature* 2015, 521, 489-94.
4. Tothill RW, Tinker AV, George J, et al. Novel molecular subtypes of serous and endometrioid ovarian cancer linked to clinical outcome. *Clin Cancer Res* 2008, 14, 5198-208.
5. Wang ZC, Birkbak NJ, Culhane AC, et al. Profiles of genomic instability in high-grade serous ovarian cancer predict treatment outcome. *Clin Cancer Res* 2012, 18, 5806-15.
6. Garsed DW, Alsop K, Fereday S, et al. Homologous Recombination DNA Repair Pathway Disruption and Retinoblastoma Protein Loss Are Associated with Exceptional Survival in High-Grade Serous Ovarian Cancer. *Clin Cancer Res* 2018, 24, 569-580.
7. Baumbusch LO, Helland A, Wang Y, et al. High levels of genomic aberrations in serous ovarian cancers are associated with better survival. *PLoS One* 2013, 8, e54356.
8. Emmanuel C, Chiew YE, George J, et al. Genomic classification of serous ovarian cancer with adjacent borderline differentiates RAS pathway and TP53-mutant tumors and identifies NRAS as an oncogenic driver. *Clin Cancer Res* 2014, 20, 6618-30.
9. Hayano T, Yokota Y, Hosomichi K, et al. Molecular characterization of an intact p53 pathway subtype in high-grade serous ovarian cancer. *PLoS One* 2014, 9, e114491.
10. Chien J, Sicotte H, Fan JB, et al. TP53 mutations, tetraploidy and homologous recombination repair defects in early stage high-grade serous ovarian cancer. *Nucleic Acids Res* 2015, 43, 6945-58.
11. Beltrame L, Di Marino M, Fruscio R, et al. Profiling cancer gene mutations in longitudinal epithelial ovarian cancer biopsies by targeted next-generation sequencing: a retrospective study. *Ann Oncol* 2015, 26, 1363-71.
12. Schwarz RF, Ng CK, Cooke SL, et al. Spatial and temporal heterogeneity in high-grade serous ovarian cancer: a phylogenetic analysis. *PLoS Med* 2015, 12, e1001789.
13. Wojnarowicz PM, Oros KK, Quinn MC, et al. The genomic landscape of TP53 and p53 annotated high grade ovarian serous carcinomas from a defined founder population associated with patient outcome. *PLoS One* 2012, 7, e45484.
14. Jean S, Li J, Katsaros D, Wubbenhorst B, Maxwell KN, Fishbein L, et al. Paclitaxel is necessary for improved survival in epithelial ovarian cancers with homologous recombination gene mutations. *Oncotarget* 2016, 7, 48577-48585.

**Supplementary Table S2.** Patient demographics are used in survival analysis.

| Data Sets         | Mutation             | Age        |            |            |       |              |       |        | Stage     |            |       |          |         |       |
|-------------------|----------------------|------------|------------|------------|-------|--------------|-------|--------|-----------|------------|-------|----------|---------|-------|
|                   |                      | Total      | ≤55        | >55        | NA    | p            | q     | p      | I&II      | III&IV     | NA    | p        | q       | p     |
| TCGA              |                      | <b>466</b> | <b>186</b> | <b>279</b> | 1     |              |       |        | <b>37</b> | <b>425</b> | 4     |          |         |       |
|                   | OS (median, months)  | 32.67      | 36.73      | 29.53      | 6     | 0.009        | 0.018 |        | 30.32     | 33.33      | 6     | 0.995    | 0.995   |       |
|                   | RFS (median, months) | 14.32      | 16.93      | 13.13      | 6     | 0.031        | 0.031 |        | 19        | 14.2       | 6     | 0.040    | 0.080   |       |
|                   | Missense             | 60.52%     | 61.29%     | 60.22%     | 0     | 0.816        | 0.952 |        | 51.35%    | 61.88%     | 0     | 0.208    | 0.728   |       |
|                   | Nonsense             | 10.73%     | 12.37%     | 9.32%      | 1     | 0.295        | 0.782 |        | 18.92%    | 9.88%      | 1     | 0.087    | 0.420   |       |
|                   | Frameshift           | 15.24%     | 16.13%     | 14.70%     | 0     | 0.674        | 0.944 |        | 13.51%    | 14.82%     | 3     | 0.829    | 0.965   |       |
|                   | Splice site          | 10.52%     | 7.53%      | 12.54%     | 0     | 0.084        | 0.782 |        | 10.81%    | 10.59%     | 0     | 0.966    | 0.966   |       |
|                   | In frame             | 3.22%      | 2.69%      | 3.58%      | 0     | 0.593        | 0.922 | 0.416  | 5.41%     | 3.06%      | 0     | 0.440    | 0.965   | 0.402 |
| Hotspot mutations | 27.04%               | 25.27%     | 28.32%     | 0          | 0.290 | 0.782        | 0.637 | 35.14% | 26.82%    | 0          | 0.322 | 0.728    | 0.563   |       |
| Validation        |                      | <b>325</b> | <b>97</b>  | <b>215</b> | 13    |              |       |        | <b>41</b> | <b>284</b> |       |          |         |       |
|                   | OS (median, months)  | 34         | 34         | 33         |       | 0.533        | 0.669 |        | 45        | 31         |       | < 0.0001 | <0.0001 |       |
|                   | RFS (median, months) | 18         | 18         | 18         |       | 0.669        | 0.669 |        | 39        | 15         |       | < 0.0001 | <0.0001 |       |
|                   | Missense             | 59.69%     | 57.73%     | 60.93%     | 7     | 0.594        | 0.717 |        | 63.41%    | 59.15%     | 0     | 0.604    | 0.796   |       |
|                   | Nonsense             | 12.00%     | 9.28%      | 13.02%     | 2     | 0.344        | 0.541 |        | 9.76%     | 12.32%     | 0     | 0.637    | 0.796   |       |
|                   | Frameshift           | 20.00%     | 27.84%     | 17.21%     | 1     | <b>0.031</b> | 0.155 |        | 17.07%    | 20.42%     | 0     | 0.616    | 0.796   |       |
|                   | Splice site          | 7.08%      | 5.15%      | 7.91%      | 1     | 0.379        | 0.541 |        | 7.32%     | 7.04%      | 0     | 0.949    | 0.949   |       |
|                   | In frame             | 1.23%      | 0.00%      | 0.93%      | 2     | 0.341        | 0.541 | 0.184  | 2.44%     | 1.06%      | 0     | 0.453    | 0.796   | 0.899 |
| Hotspot mutations | 20.62%               | 16.49%     | 22.33%     | 3          | 0.560 | 0.717        | 0.071 | 24.39% | 20.07%    | 0          | 0.807 | 0.949    | 0.454   |       |
| Combined          |                      | <b>791</b> | <b>283</b> | <b>494</b> | 14    |              |       |        | <b>78</b> | <b>709</b> | 4     |          |         |       |
|                   | OS (median, months)  | 33         | 35.1       | 31         |       | 0.014        | 0.028 |        | 41        | 32.57      |       | 0.012    | 0.012   |       |
|                   | RFS (median, months) | 15.33      | 16.97      | 14.65      |       | 0.193        | 0.193 |        | 28.93     | 14.7       |       | < 0.0001 | <0.0001 |       |
|                   | Missense             | 60.05%     | 60.07%     | 60.32%     | 7     | 0.941        | 0.942 |        | 56.41%    | 60.79%     | 0     | 0.485    | 0.965   |       |
|                   | Nonsense             | 11.38%     | 11.31%     | 11.13%     | 3     | 0.941        | 0.942 |        | 14.10%    | 11.00%     | 1     | 0.362    | 0.965   |       |
|                   | Frameshift           | 17.19%     | 20.14%     | 15.79%     | 1     | 0.124        | 0.595 |        | 15.38%    | 17.07%     | 3     | 0.707    | 0.965   |       |
|                   | Splice site          | 8.98%      | 6.71%      | 10.32%     | 1     | 0.091        | 0.594 |        | 8.97%     | 9.03%      | 0     | 0.955    | 0.965   |       |
|                   | In frame             | 2.40%      | 1.77%      | 2.43%      | 2     | 0.544        | 0.888 | 0.283  | 3.85%     | 2.26%      | 0     | 0.361    | 0.965   | 0.770 |
| Hotspot mutations | 38.69%               | 36.75%     | 39.47%     | 7          | 0.463 | 0.888        | 0.407 | 38.46% | 38.79%    | 1          | 0.452 | 0.965    | 0.991   |       |

Supplementary Table S3. Univariate OS and RFS analyses of type of *TP53* mutations in training, validation and combined sets of HGSOc.

| Covariates                               | Training set (TCGA) |          |          |           | Validation set |              |          |           | Combined data |          |          |           |
|------------------------------------------|---------------------|----------|----------|-----------|----------------|--------------|----------|-----------|---------------|----------|----------|-----------|
|                                          | HR                  | <i>p</i> | <i>q</i> | 95%CI     | HR             | <i>p</i>     | <i>q</i> | 95%CI     | HR            | <i>p</i> | <i>q</i> | 95%CI     |
| <b>OS</b>                                |                     |          |          |           |                |              |          |           |               |          |          |           |
| Missense vs nonsense                     | 0.99                | 0.974    | 0.974    | 0.66-1.48 | 0.67           | 0.103        | 0.275    | 0.42-1.08 | 0.85          | 0.291    | 0.881    | 0.62-1.15 |
| Missense vs frameshift                   | 0.97                | 0.718    | 0.947    | 0.81-1.16 | 0.92           | 0.366        | 0.418    | 0.78-1.10 | 0.96          | 0.492    | 0.904    | 0.84-1.08 |
| Missense vs splice site                  | 1.05                | 0.426    | 0.936    | 0.93-1.19 | 1.14           | 0.158        | 0.316    | 0.95-1.36 | 1.06          | 0.236    | 0.881    | 0.96-1.17 |
| Nonsense vs splice site                  | 1.08                | 0.559    | 0.947    | 0.84-1.38 | 1.49           | <b>0.023</b> | 0.184    | 1.06-2.11 | 1.19          | 0.088    | 0.780    | 0.97-1.45 |
| Nonsense vs frameshift                   | 0.94                | 0.813    | 0.947    | 0.57-1.54 | 1.24           | 0.444        | 0.444    | 0.72-2.13 | 1.08          | 0.690    | 0.904    | 0.75-1.55 |
| Splice site vs frameshift                | 1.24                | 0.364    | 0.936    | 0.78-1.98 | 1.83           | 0.052        | 0.208    | 0.99-3.36 | 1.33          | 0.120    | 0.780    | 0.93-1.89 |
| Splice site vs inframe                   | 1.15                | 0.705    | 0.947    | 0.56-2.32 |                |              |          |           | 1.20          | 0.563    | 0.904    | 0.64-2.27 |
| Nonsense vs inframe                      | 1.10                | 0.432    | 0.936    | 0.87-1.40 |                |              |          |           | 0.88          | 0.695    | 0.904    | 0.47-1.66 |
| Missense vs inframe                      | 1.07                | 0.388    | 0.936    | 0.91-1.26 |                |              |          |           | 1.01          | 0.981    | 0.981    | 0.57-1.79 |
| Frameshift vs inframe                    | 1.17                | 0.371    | 0.936    | 0.83-1.67 |                |              |          |           | 0.91          | 0.769    | 0.909    | 0.50-1.68 |
| Missense vs truncated                    | 1.05                | 0.778    | 0.947    | 0.76-1.44 | 1.15           | 0.322        | 0.418    | 0.87-1.53 | 1.04          | 0.655    | 0.904    | 0.86-1.26 |
| Missense (without hotspots) vs truncated | 0.98                | 0.874    | 0.947    | 0.76-1.26 | 1.27           | 0.203        | 0.325    | 0.88-1.84 | 1.23          | 0.339    | 0.881    | 0.88-1.43 |
| Inframe vs truncated                     | 1.05                | 0.432    | 0.936    | 0.92-1.20 |                |              |          |           | 1.03          | 0.909    | 0.981    | 0.58-1.86 |
| <b>RFS</b>                               |                     |          |          |           |                |              |          |           |               |          |          |           |
| Missense vs nonsense                     | 0.97                | 0.903    | 0.908    | 0.66-1.44 | 0.89           | 0.577        | 0.820    | 0.58-1.35 | 0.92          | 0.580    | 0.932    | 0.69-1.23 |
| Missense vs frameshift                   | 1.01                | 0.908    | 0.908    | 0.85-1.20 | 1.05           | 0.526        | 0.820    | 0.89-1.24 | 1.03          | 0.645    | 0.932    | 0.91-1.16 |
| Missense vs splice site                  | 0.95                | 0.479    | 0.890    | 0.84-1.09 | 1.04           | 0.696        | 0.820    | 0.86-1.25 | 0.98          | 0.733    | 0.953    | 0.88-1.09 |
| Nonsense vs splice site                  | 0.95                | 0.717    | 0.908    | 0.74-1.23 | 1.13           | 0.455        | 0.820    | 0.82-1.57 | 1.01          | 0.884    | 0.990    | 0.83-1.24 |
| Nonsense vs frameshift                   | 1.07                | 0.774    | 0.908    | 0.67-1.73 | 1.29           | 0.289        | 0.820    | 0.80-2.09 | 1.17          | 0.353    | 0.830    | 0.84-1.64 |
| Splice site vs frameshift                | 0.83                | 0.456    | 0.890    | 0.51-1.35 | 1.08           | 0.811        | 0.820    | 0.59-1.96 | 0.9           | 0.570    | 0.932    | 0.63-1.30 |
| Splice site vs inframe                   | 0.73                | 0.463    | 0.890    | 0.32-1.68 |                |              |          |           | 1.38          | 0.356    | 0.830    | 0.69-2.76 |
| Nonsense vs inframe                      | 0.88                | 0.363    | 0.890    | 0.67-1.16 |                |              |          |           | 1.35          | 0.383    | 0.830    | 0.69-2.65 |
| Missense vs inframe                      | 0.90                | 0.253    | 0.890    | 0.74-1.08 |                |              |          |           | 1.47          | 0.232    | 0.830    | 0.78-2.76 |
| Frameshift vs inframe                    | 0.80                | 0.268    | 0.890    | 0.53-1.19 |                |              |          |           | 1.55          | 0.190    | 0.830    | 0.81-2.98 |
| Missense (all) vs truncated              | 1.04                | 0.750    | 0.908    | 0.81-1.33 | 0.97           | 0.820        | 0.820    | 0.74-1.27 | 1.00          | 0.990    | 0.990    | 0.83-1.20 |
| Missense (without hotspots) vs truncated | 0.97                | 0.853    | 0.908    | 0.71-1.33 | 1.09           | 0.634        | 0.820    | 0.77-1.54 | 1.00          | 0.968    | 0.990    | 0.80-1.27 |
| Inframe vs truncated                     | 0.93                | 0.322    | 0.890    | 0.79-1.08 |                |              |          |           | 0.69          | 0.260    | 0.830    | 0.37-1.31 |

Supplementary Table S4. Univariate OS and RFS analysis of *TP53* hotspot mutations in combined set of HGSOC.

| Covariates     | OS    |                   |                   |            | RFS  |              |       |            |
|----------------|-------|-------------------|-------------------|------------|------|--------------|-------|------------|
|                | HR    | p                 | q                 | 95%CI      | HR   | p            | q     | 95%CI      |
| R273C vs R273L | 0.61  | 0.446             | 0.446             | 0.17-2.16  | 0.22 | <b>0.029</b> | 0.158 | 0.05-0.86  |
| R273 vs Y163C  | 1.23  | <b>&lt;0.0001</b> | <b>&lt;0.0001</b> | 1.10-1.38  | 1.11 | 0.102        | 0.213 | 0.98-1.25  |
| R273 vs G266   | 1.14  | <b>&lt;0.0001</b> | <b>&lt;0.0001</b> | 1.06-1.22  | 1.07 | 0.119        | 0.219 | 0.98-1.15  |
| R273 vs R282   | 1.08  | <b>0.007</b>      | <b>0.023</b>      | 1.02-1.15  | 1.06 | <b>0.016</b> | 0.158 | 1.01-1.12  |
| R175 vs Y163C  | 1.35  | <b>0.001</b>      | <b>0.012</b>      | 1.14-1.60  | 1.15 | 0.117        | 0.219 | 0.97-1.36  |
| R175 vs G266   | 1.93  | <b>&lt;0.0001</b> | <b>&lt;0.0001</b> | 1.08-1.31  | 1.09 | 0.116        | 0.219 | 0.98-1.20  |
| R175 vs R282   | 1.12  | <b>0.004</b>      | <b>0.018</b>      | 1.04-1.20  | 1.07 | <b>0.025</b> | 0.158 | 1.01-1.14  |
| C176 vs Y163C  | 0.50  | <b>0.002</b>      | <b>0.017</b>      | 0.32-0.77  | 1.58 | <b>0.027</b> | 0.158 | 1.05-2.38  |
| C176 vs G266   | 4.64  | <b>0.006</b>      | <b>0.021</b>      | 1.55-13.86 | 1.20 | <b>0.042</b> | 0.158 | 1.01-1.42  |
| C176 vs R282   | 1.32  | <b>0.011</b>      | <b>0.028</b>      | 1.07-1.64  | 1.14 | <b>0.010</b> | 0.158 | 1.03-1.25  |
| S241 vs Y163C  | 0.73  | <b>0.006</b>      | <b>0.021</b>      | 0.58-0.91  | 0.89 | 0.143        | 0.228 | 0.75-1.04  |
| S241 vs G266   | 0.51  | <b>0.004</b>      | <b>0.018</b>      | 0.32-0.81  | 0.75 | 0.144        | 0.228 | 0.52-1.10  |
| S241 vs R282   | 2.80  | <b>0.014</b>      | <b>0.032</b>      | 1.23-6.34  | 2.01 | <b>0.018</b> | 0.158 | 1.13-3.61  |
| R248 vs Y163C  | 1.15  | <b>0.033</b>      | <b>0.046</b>      | 1.01-1.31  | 1.09 | 0.220        | 0.314 | 0.95-1.26  |
| R248 vs G266   | 1.11  | <b>0.011</b>      | <b>0.028</b>      | 10.2-1.20  | 1.05 | 0.266        | 0.360 | 0.96-1.15  |
| R248 vs R282   | 1.06  | 0.085             | 0.089             | 0.99-1.12  | 1.06 | 0.059        | 0.158 | 0.99-1.12  |
| Y220 vs Y163C  | 1.28  | <b>0.014</b>      | <b>0.032</b>      | 1.05-1.56  | 1.16 | 0.173        | 0.257 | 0.94-1.42  |
| Y220 vs G266   | 1.17  | <b>0.003</b>      | <b>0.017</b>      | 1.05-1.30  | 1.07 | 0.225        | 0.314 | 0.96-1.20  |
| Y220 vs R282   | 1.08  | <b>0.045</b>      | 0.058             | 1.00-1.17  | 1.08 | <b>0.035</b> | 0.158 | 1.01-1.15  |
| I195 vs Y163C  | 1.34  | <b>0.042</b>      | 0.057             | 1.01-1.77  | 1.14 | 0.360        | 0.449 | 0.86-1.50  |
| I195 vs G266   | 1.14  | 0.051             | 0.062             | 0.99-1.29  | 1.06 | 0.371        | 0.449 | 0.93-1.22  |
| I195 vs R282   | 1.07  | 0.137             | 0.140             | 0.98-1.18  | 1.06 | 0.164        | 0.251 | 0.98-1.14  |
| G245 vs Y163C  | 2.61  | <b>0.003</b>      | <b>0.017</b>      | 1.39-4.91  | 1.77 | <b>0.044</b> | 0.158 | 1.02-3.09  |
| G245 vs G266   | 1.32  | <b>0.003</b>      | <b>0.017</b>      | 1.10-1.58  | 1.19 | 0.062        | 0.158 | 0.99-1.43  |
| G245 vs R282   | 1.19  | <b>0.010</b>      | <b>0.028</b>      | 1.04-1.35  | 1.17 | <b>0.003</b> | 0.138 | 1.06-1.31  |
| H179 vs Y163C  | 0.22  | <b>0.022</b>      | <b>0.037</b>      | 0.06-0.80  | 0.56 | 0.370        | 0.449 | 0.16-1.99  |
| H179 vs G266   | 1.67  | <b>0.018</b>      | <b>0.035</b>      | 1.09-2.56  | 1.26 | 0.291        | 0.382 | 0.82-1.93  |
| H179 vs R282   | 1.17  | 0.065             | 0.073             | 0.99-1.38  | 1.13 | 0.124        | 0.219 | 0.97-1.32  |
| P278 vs Y163C  | 0.52  | <b>0.043</b>      | 0.057             | 0.28-0.98  | 0.78 | 0.409        | 0.482 | 0.42-1.42  |
| P278 vs G266   | 1.71  | 0.066             | 0.073             | 0.97-3.02  | 1.15 | 0.666        | 0.747 | 0.61-2.19  |
| P278 vs R282   | 1.19  | 0.085             | 0.089             | 0.98-1.46  | 1.19 | 0.058        | 0.158 | 0.99-1.42  |
| H193 vs Y163C  | 0.74  | <b>0.033</b>      | <b>0.046</b>      | 0.56-0.98  | 0.98 | 0.858        | 0.881 | 0.77-1.24  |
| H193 vs G266   | 0.18  | <b>0.015</b>      | <b>0.033</b>      | 0.05-0.72  | 0.95 | 0.936        | 0.936 | 0.29-3.14  |
| H193 vs R282   | 1.43  | 0.054             | 0.064             | 0.99-2.05  | 1.03 | 0.829        | 0.881 | 0.78-1.35  |
| C275 vs Y163C  | 0.78  | <b>0.033</b>      | <b>0.046</b>      | 0.62-0.98  | 0.84 | 0.100        | 0.213 | 0.67-1.04  |
| C275 vs G266   | 0.48  | <b>0.021</b>      | <b>0.037</b>      | 0.26-0.90  | 0.61 | 0.132        | 0.225 | 0.32-1.16  |
| C275 vs R282   | 1.56  | 0.067             | 0.073             | 0.97-2.50  | 1.43 | 0.072        | 0.166 | 0.97-2.11  |
| D281 vs Y163C  | 0.42  | <b>0.017</b>      | <b>0.034</b>      | 0.21-0.86  | 0.57 | 0.051        | 0.158 | 0.33-1.00  |
| D281 vs G266   | 11.38 | <b>0.023</b>      | <b>0.038</b>      | 1.40-92.63 | 4.85 | 0.061        | 0.158 | 0.93-25.27 |
| D281 vs R282   | 1.48  | <b>0.033</b>      | <b>0.046</b>      | 1.03-2.13  | 1.33 | <b>0.034</b> | 0.158 | 1.02-1.73  |
| C238 vs Y163C  | 0.75  | <b>0.005</b>      | <b>0.021</b>      | 0.61-0.92  | 0.97 | 0.744        | 0.815 | 0.83-1.14  |
| C238 vs G266   | 0.58  | <b>0.010</b>      | <b>0.028</b>      | 0.38-0.88  | 0.97 | 0.862        | 0.881 | 0.66-1.41  |
| C238 vs R282   | 2.20  | <b>0.028</b>      | <b>0.044</b>      | 1.09-4.44  | 1.19 | 0.521        | 0.599 | 0.70-2.01  |
| Y234 vs Y163C  | 0.89  | <b>0.011</b>      | <b>0.028</b>      | 0.81-0.97  | 0.92 | 0.069        | 0.166 | 0.85-1.01  |
| Y234 vs G266   | 0.90  | <b>0.010</b>      | <b>0.028</b>      | 0.84-0.98  | 0.92 | 0.058        | 0.158 | 0.84-1.00  |
| Y234 vs R282   | 5.15  | 0.051             | 0.062             | 0.99-26.73 | 4.32 | <b>0.036</b> | 0.158 | 1.10-16.97 |

Supplementary Figure S1

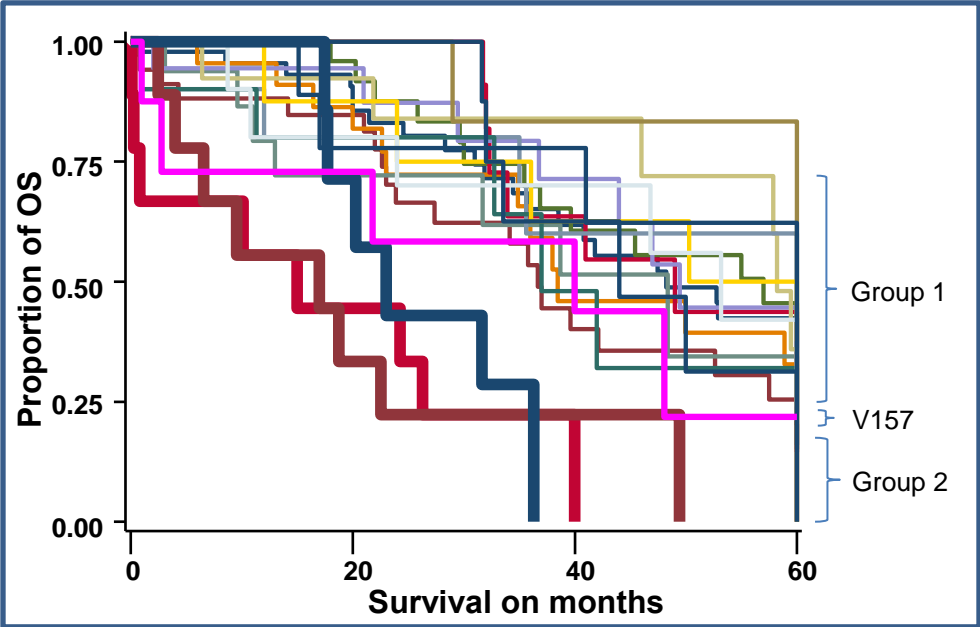

Supplementary Table S5-1. Differentially expressed proteins between R273 and R248 hotspot mutations

| Proteins        | Median   |          | <i>p</i> | <i>q</i> |
|-----------------|----------|----------|----------|----------|
|                 | R273     | R248     |          |          |
| ASNS            | 0.50642  | 0.046715 | 0.033947 | 0.039286 |
| CJUNPS73        | 0.075365 | 0.15423  | 0.039286 | 0.039286 |
| NCADHERIN       | 0.54404  | 0.11639  | 0.026599 | 0.039286 |
| PCNA            | 0.0369   | -0.19117 | 0.022621 | 0.039286 |
| RAD51           | -0.02955 | -0.12785 | 0.027404 | 0.039286 |
| MYOSINIIAPS1943 | 0.096777 | 0.25636  | 0.029551 | 0.039286 |
| NDRG1PT346      | -0.20926 | 0.41861  | 0.029351 | 0.039286 |
| BCL2A1          | 0.18539  | -0.0434  | 0.03704  | 0.039286 |
| PYGL            | 0.50642  | 0.046715 | 0.033947 | 0.039286 |
| NRF2            | 0.075365 | 0.15423  | 0.039286 | 0.039286 |

Supplementary Table S5-2. Differentially expressed proteins between R273 and R282 hotspot mutations

| Proteins         | Median   |          | <i>p</i> | <i>q</i> |
|------------------|----------|----------|----------|----------|
|                  | R273     | R282     |          |          |
| MTOR             | 0.25709  | 0.38439  | 0.003918 | 0.011754 |
| PEA15            | 0.131798 | -0.39006 | 0.000501 | 0.003006 |
| NRAS             | -0.03993 | 0.043484 | 0.024776 | 0.024776 |
| TRANSGLUTAMINASE | -0.35085 | -0.61802 | 0.015056 | 0.020089 |
| MYOSINIIA        | 0.036432 | -0.24965 | 0.016741 | 0.020089 |
| ERK2             | 0.080393 | -0.63057 | 0.009089 | 0.018178 |

Supplementary Table S5-3. Differentially expressed proteins between R273 and Y163C hotspot mutations

| Proteins           | Median   |          | <i>p</i> | <i>q</i> |
|--------------------|----------|----------|----------|----------|
|                    | R273     | Y163C    |          |          |
| BAK                | -0.2383  | -0.4763  | 0.006147 | 0.016685 |
| BIM                | 0.350825 | -0.26626 | 0.00044  | 0.005573 |
| CMETPY1235         | 0.113150 | -0.02097 | 0.034191 | 0.043309 |
| CYCLINB1           | 0.316945 | 0.94647  | 0.009817 | 0.021944 |
| EGFR               | -0.20423 | -0.41274 | 0.000366 | 0.005573 |
| EGFRPY1173         | -0.10766 | -0.17253 | 0.001584 | 0.015048 |
| ERK2               | 0.080399 | -0.36597 | 0.046477 | 0.047733 |
| FOXO3A             | 0.032892 | -0.15627 | 0.043963 | 0.047147 |
| GSKALPHABETAPS21S9 | -0.42551 | 0.040349 | 0.03051  | 0.041537 |
| MAPKPT202Y204      | 0.347425 | 1.2262   | 0.003622 | 0.015982 |
| MEK1PS217S221      | -0.17331 | 0.51562  | 0.021043 | 0.038012 |
| MTORPS2448         | 0.18221  | 0.40045  | 0.004618 | 0.015982 |
| P27                | -0.11146 | -0.37691 | 0.023125 | 0.038012 |
| P90RSKPT359S363    | 0.165305 | 0.482335 | 0.024959 | 0.038012 |
| PEA15              | 0.131798 | -0.23834 | 0.004923 | 0.015982 |

|                     |          |          |          |          |
|---------------------|----------|----------|----------|----------|
| PR                  | -0.09387 | -0.24385 | 0.004051 | 0.015982 |
| STATPY705           | 0.11217  | 0.478415 | 0.018166 | 0.034515 |
| STATHMIN            | -0.00672 | -0.06878 | 0.022299 | 0.038012 |
| BADPS112            | 0.28137  | 0.62223  | 0.00335  | 0.015982 |
| FASN                | -0.47288 | -1.35115 | 0.005047 | 0.015982 |
| FOXM1               | 0.250255 | 1.061355 | 0.005882 | 0.016685 |
| GSK3PS9             | -0.27432 | 0.154786 | 0.035467 | 0.043476 |
| P27PT198            | 0.023229 | -0.08301 | 0.029956 | 0.041537 |
| PDCD4               | 0.50407  | 1.20225  | 0.002434 | 0.015982 |
| PKCPANBETAIIIPS660  | -0.064   | 0.42061  | 0.025008 | 0.038012 |
| RAB11               | -0.03824 | -0.16609 | 0.01326  | 0.02652  |
| ERCC1               | -0.05501 | -0.15622 | 0.030606 | 0.041537 |
| MSH2                | 0.223    | 0.577635 | 0.037953 | 0.043703 |
| AXL                 | -0.15884 | 0.131862 | 0.037363 | 0.043703 |
| CDK1PY15            | -0.18633 | 0.193455 | 0.003837 | 0.015982 |
| CD26                | -0.09182 | -0.18406 | 0.048874 | 0.048874 |
| CHK1PS296           | 0.030596 | 0.140965 | 0.008159 | 0.019378 |
| ERCC5               | -0.27656 | 0.206275 | 0.011024 | 0.023272 |
| P16INK4A            | 1.2558   | 1.65385  | 0.044666 | 0.047147 |
| CTLA4               | -0.2383  | -0.4763  | 0.006615 | 0.016757 |
| MACC1               | 0.350825 | -0.26626 | 0.00044  | 0.005573 |
| NRF2                | 0.075365 | 0.34139  | 0.041502 | 0.046385 |
| THYMIDILATESYNTHASE | 0.011315 | -0.02097 | 0.034191 | 0.043309 |

Supplementary Table S5-4. Differentially expressed proteins between R273 and G266 hotspot mutations

| Proteins            | Median   |          |          |          |
|---------------------|----------|----------|----------|----------|
|                     | R273     | G266     | <i>p</i> | <i>q</i> |
| CMETPY1235          | 0.011315 | 0.10229  | 0.033221 | 0.039076 |
| NOTCH1              | -0.26107 | 0.132825 | 0.031435 | 0.039076 |
| YAP                 | 0.241725 | -0.30376 | 0.020909 | 0.039076 |
| ANNEXINVII          | -0.04412 | -0.24813 | 0.03225  | 0.039076 |
| ANNEXIN1            | 0.36209  | -0.45296 | 0.0273   | 0.039076 |
| JAB1                | 0.05345  | -0.16196 | 0.019834 | 0.039076 |
| AXL                 | -0.15884 | 0.19755  | 0.049351 | 0.039076 |
| THYMIDILATESYNTHASE | 0.011315 | 0.10229  | 0.033221 | 0.039076 |
| EPPK1               | 2.17695  | 0.058108 | 0.034734 | 0.039076 |

Supplementary Table S5-5. Differentially expressed proteins between R175 and R248 hotspot mutations

| Proteins | Median   |          |          |          |
|----------|----------|----------|----------|----------|
|          | R175     | R248     | <i>p</i> | <i>q</i> |
| CIAP     | 0.092068 | -0.01701 | 0.039247 | 0.043608 |
| ER-ALPHA | 1.0759   | 1.68795  | 0.049641 | 0.049641 |
| INPP4B   | -0.18453 | 0.126813 | 0.009644 | 0.025156 |



|               |          |          |          |          |
|---------------|----------|----------|----------|----------|
| P53           | 0.407345 | 0.702545 | 0.013718 | 0.025156 |
| VEGFR2        | 0.20894  | 0.006479 | 0.016744 | 0.025156 |
| PDK1          | 0.11001  | -0.00669 | 0.017955 | 0.025156 |
| SF2           | 0.007797 | -0.09893 | 0.016261 | 0.025156 |
| TUBERINpT1462 | 0.14657  | -0.25397 | 0.014996 | 0.025156 |
| MSH2          | -0.07729 | 0.257855 | 0.020125 | 0.025156 |
| MSH6          | 0.032965 | 0.37794  | 0.0123   | 0.025156 |

Supplementary Table S5-6. Differentially expressed proteins between R175 and R282 hotspot mutations

| Proteins         | Median   |          |          |          |
|------------------|----------|----------|----------|----------|
|                  | R175     | R282     | <i>p</i> | <i>q</i> |
| HER3             | 0.15521  | -0.0185  | 0.019599 | 0.025766 |
| KU80             | -0.27715 | 0.15987  | 0.011964 | 0.019142 |
| MTOR             | 0.039794 | 0.38439  | 2.27E-06 | 6.32E-05 |
| NOTCH1           | -0.27005 | -0.07012 | 0.000418 | 0.002229 |
| P38MAPK          | 0.006595 | -0.34    | 0.027446 | 0.030013 |
| PAI              | 0.059292 | -0.5291  | 0.016099 | 0.023417 |
| PEA15            | 0.063432 | -0.39006 | 0.000203 | 0.001624 |
| YAPPS127         | 0.54093  | 0.23633  | 0.003293 | 0.011085 |
| CD20             | -0.09122 | -0.19592 | 0.007127 | 0.01629  |
| FOXO1            | 0.07953  | 0.4515   | 0.003464 | 0.011085 |
| RICTORPT1135     | 0.11081  | -0.01293 | 0.028137 | 0.030013 |
| TRANSGLUTAMINASE | -0.46113 | -0.61802 | 0.020935 | 0.025766 |
| AXL              | 0.12286  | -0.11121 | 0.00696  | 0.01629  |
| MYOSINIIIA       | 0.055057 | -0.24695 | 0.010374 | 0.018443 |
| DUSP4            | -0.32201 | -0.1447  | 0.009267 | 0.018447 |
| PDK1             | 0.069959 | -0.21678 | 0.048367 | 0.048367 |

Supplementary Table S5-7. Differentially expressed proteins between R175 and Y163C hotspot mutations

| Proteins            | Median   |          |          |          |
|---------------------|----------|----------|----------|----------|
|                     | R175     | Y163C    | <i>p</i> | <i>q</i> |
| AKTPT308            | -0.74848 | -0.42893 | 0.007022 | 0.013068 |
| AR                  | 0.52445  | -0.12727 | 0.045501 | 0.048277 |
| BAK                 | -0.20063 | -0.4763  | 0.007319 | 0.013068 |
| BIM                 | 0.3781   | -0.26626 | 0.004997 | 0.012685 |
| CYCLINB1            | -0.04788 | 0.94647  | 0.000548 | 0.006191 |
| EGFR                | -0.11537 | -0.41274 | 0.000807 | 0.006191 |
| EGFRPY1173          | -0.05538 | -0.17253 | 0.002894 | 0.00955  |
| FOXO3A              | 0.037577 | -0.15627 | 0.011733 | 0.016834 |
| GSK3ALPHABETAPS21S9 | -0.57847 | 0.040349 | 0.025229 | 0.030835 |
| KU80                | -0.27715 | 0.085044 | 0.008215 | 0.013288 |
| MAPKPT202Y204       | 0.7065   | 1.2262   | 0.008456 | 0.013288 |

|                             |          |          |          |          |
|-----------------------------|----------|----------|----------|----------|
| MEK1PS217S221               | -0.03664 | 0.51562  | 0.049406 | 0.049406 |
| MTORPS2448                  | 0.2559   | 0.40045  | 0.007501 | 0.013068 |
| P27                         | 0.031651 | -0.37691 | 0.00085  | 0.006191 |
| PEA15                       | 0.063432 | -0.23836 | 0.002004 | 0.008267 |
| PR                          | -0.13142 | -0.24385 | 0.012288 | 0.016896 |
| SYK                         | 0.77143  | 1.2806   | 0.0155   | 0.02046  |
| BADPS112                    | 0.36245  | 0.62223  | 0.00436  | 0.012685 |
| CD20                        | -0.09122 | -0.18073 | 0.016711 | 0.02121  |
| FASN                        | -0.53817 | -1.35115 | 0.007524 | 0.013068 |
| FOXMI                       | 0.07953  | 1.061355 | 0.000938 | 0.006191 |
| P27PT198                    | 0.035527 | -0.08301 | 0.001141 | 0.006273 |
| PDCD4                       | 0.58143  | 1.20225  | 0.008993 | 0.013489 |
| PKCPANBETAIIPS660           | 0.042578 | 0.42061  | 0.046814 | 0.048277 |
| MSH2                        | -0.0839  | 0.577635 | 0.000922 | 0.006191 |
| MSH6                        | -0.00309 | 0.78435  | 0.036217 | 0.041212 |
| CDK1PY15                    | -0.18491 | 0.193455 | 0.002468 | 0.009049 |
| CD26                        | -0.07492 | -0.18406 | 0.034208 | 0.040317 |
| CHK1PS296                   | 0.016797 | 0.140965 | 0.001873 | 0.008267 |
| OXPHOSCOMPLX V<br>SUBUNIT B | -0.74848 | -0.42893 | 0.007022 | 0.013068 |
| PYGBAB2                     | 0.52445  | -0.12727 | 0.045501 | 0.048277 |
| CTLA4                       | -0.20063 | -0.4763  | 0.007319 | 0.013068 |
| MACC1                       | 0.3781   | -0.26626 | 0.004997 | 0.012685 |

Supplementary Table S5-8. Differentially expressed proteins between R175 and G266 hotspot mutations

| Proteins   | Median   |          | <i>p</i> | <i>q</i> |
|------------|----------|----------|----------|----------|
|            | R175     | G266     |          |          |
| BID        | -0.12567 | 0.2221   | 0.048155 | 0.049718 |
| CMETPY1235 | 0.014106 | 0.10229  | 0.029754 | 0.049718 |
| NOTCH1     | -0.27005 | 0.132825 | 0.006298 | 0.049718 |
| YAP        | 0.1692   | -0.30376 | 0.027761 | 0.049718 |
| YAPPS127   | 0.54093  | -0.11524 | 0.038994 | 0.049718 |
| ANNEXINVII | -0.05076 | -0.24813 | 0.04329  | 0.049718 |
| HEREGULIN  | 0.019876 | -0.05316 | 0.049718 | 0.049718 |
| JAB1       | 0.077014 | -0.16196 | 0.013983 | 0.049718 |
| LCN2A      | -0.12567 | 0.2221   | 0.048155 | 0.049718 |

Supplementary Table S5-9. Differentially expressed proteins between C176 and R282 hotspot mutations

| Proteins  | Median   |         | <i>p</i> | <i>q</i> |
|-----------|----------|---------|----------|----------|
|           | C176     | R282    |          |          |
| CAVEOLIN1 | -0.27521 | -1.6251 | 0.026711 | 0.036276 |
| MTOR      | 0.056779 | 0.38439 | 0.002925 | 0.016088 |

|                  |          |          |          |          |
|------------------|----------|----------|----------|----------|
| MTORPS2448       | -0.08231 | 0.25577  | 0.039901 | 0.039901 |
| P38MAPK          | -0.02582 | -0.34    | 0.022858 | 0.036276 |
| PEA15            | 0.19821  | -0.39006 | 0.001562 | 0.016088 |
| YAPPS127         | 0.72934  | 0.23633  | 0.02968  | 0.036276 |
| FOXO3APS318S321  | 0.09696  | -0.12485 | 0.027647 | 0.036276 |
| TRANSGLUTAMINASE | -0.36487 | -0.61802 | 0.006309 | 0.023133 |
| JAB1             | -0.06948 | 0.07454  | 0.019815 | 0.036276 |
| MYOSINIIA        | -0.01697 | -0.24695 | 0.037839 | 0.039901 |
| DUSP4            | -0.43984 | -0.1447  | 0.011732 | 0.032263 |

Supplementary Table S5-10. Differentially expressed proteins between C176 and Y163 hotspot mutations

| Proteins          | Median   |          | <i>p</i> | <i>q</i> |
|-------------------|----------|----------|----------|----------|
|                   | C176     | Y163     |          |          |
| BAK               | -0.30285 | -0.4763  | 0.016975 | 0.035025 |
| BIM               | 0.70943  | -0.26626 | 0.001141 | 0.009508 |
| CYCLINB1          | 0.26474  | 0.94647  | 0.027053 | 0.035388 |
| EGFR              | -0.25223 | -0.41274 | 0.017923 | 0.035025 |
| EGFRPY1173        | -0.05287 | -0.17253 | 0.002591 | 0.011575 |
| HSP70             | 0.2186   | -0.35642 | 0.018213 | 0.035025 |
| IRS1              | -0.09782 | -0.34309 | 0.02831  | 0.035388 |
| JNK2              | -0.17025 | -0.64792 | 0.022708 | 0.035388 |
| MTORPS2448        | -0.08231 | 0.40045  | 0.000146 | 0.00365  |
| NOTCH1            | -0.15221 | -0.40967 | 0.023773 | 0.035388 |
| P27               | 0.18617  | -0.37691 | 0.008427 | 0.026334 |
| P90RSKPT359S363   | 0.12768  | 0.482535 | 0.027911 | 0.035388 |
| PEA15             | 0.19821  | -0.23836 | 0.010573 | 0.029369 |
| STAT3PY705        | 0.25743  | 0.478415 | 0.027905 | 0.035388 |
| BADPS112          | 0.22714  | 0.62223  | 0.002268 | 0.011575 |
| FASN              | -0.72136 | -1.35115 | 0.02049  | 0.035388 |
| FOXM1             | 0.62208  | 1.061355 | 0.040697 | 0.044144 |
| P27PT198          | 0.16132  | -0.08301 | 0.002778 | 0.011575 |
| PDCD4             | 0.50861  | 1.20225  | 0.005923 | 0.021154 |
| PKCPANBETAIIPS660 | -0.03067 | 0.42061  | 0.046096 | 0.046096 |
| CDK1PY15          | -0.16403 | 0.193455 | 0.042378 | 0.044144 |
| CHK1PS296         | 0.011275 | 0.140965 | 0.033789 | 0.040225 |
| P16INK4A          | 1.2083   | 1.65385  | 0.036638 | 0.041634 |
| CTLA4             | -0.30285 | -0.4763  | 0.016975 | 0.035025 |
| MACC1             | 0.70943  | -0.26626 | 0.001141 | 0.009508 |

Supplementary Table S5-11. Differentially expressed proteins between C176 and G266 hotspot mutations

| Proteins   | Median   |          | <i>p</i> | <i>q</i> |
|------------|----------|----------|----------|----------|
|            | C176     | G266     |          |          |
| MTORPS2448 | -0.08231 | 0.233    | 0.042533 | 0.047231 |
| YAP        | 0.25017  | -0.30376 | 0.015602 | 0.046806 |
| YAPPS127   | 0.72934  | -0.11524 | 0.047231 | 0.047231 |

Supplementary Table S5-12. Differentially expressed proteins between S241 and R282 hotspot mutations

| Proteins        | Median   |          | <i>p</i> | <i>q</i> |
|-----------------|----------|----------|----------|----------|
|                 | S241     | R282     |          |          |
| CYCLINE1        | 0.392395 | 0.90032  | 0.036117 | 0.049433 |
| FIBRONECTIN     | 0.707615 | -0.40426 | 0.049433 | 0.049433 |
| MTOR            | 0.034511 | 0.38439  | 0.009999 | 0.049433 |
| P38MAPK         | 0.02863  | -0.34    | 0.034268 | 0.049433 |
| PEA15           | 0.227595 | -0.39006 | 0.018769 | 0.049433 |
| FASN            | -1.31455 | 0.31497  | 0.020997 | 0.049433 |
| FOXO3APS318S321 | 0.22235  | -0.12485 | 0.025143 | 0.049433 |
| MYOSINIIAPS1943 | 0.367975 | 0.007241 | 0.024702 | 0.049433 |
| P27PT198        | 0.17231  | 0.044192 | 0.046146 | 0.049433 |
| CASPASE8        | -0.14402 | 0.067161 | 0.049055 | 0.049433 |
| MYOSINIIA       | 0.199711 | -0.24695 | 0.035309 | 0.049433 |

Supplementary Table S5-13. Differentially expressed proteins between S241 and Y163 hotspot mutations

| Proteins  | Median   |          | <i>p</i> | <i>q</i> |
|-----------|----------|----------|----------|----------|
|           | S241     | Y163     |          |          |
| BAK       | -0.26836 | -0.4763  | 0.048608 | 0.048661 |
| BIM       | 0.44712  | -0.26626 | 0.02083  | 0.039346 |
| CHK2      | -0.05354 | 0.33765  | 0.035031 | 0.046148 |
| DVL3      | 0.458475 | 0.265045 | 0.01098  | 0.038848 |
| FOXO3A    | -0.01253 | -0.15627 | 0.033394 | 0.046148 |
| JNK2      | -0.03965 | -0.64792 | 0.013711 | 0.038848 |
| P27       | 0.193045 | -0.37691 | 0.000996 | 0.016397 |
| RAD51     | -0.18836 | -0.058   | 0.035856 | 0.046148 |
| FOXO3A    | -0.02067 | 1.061355 | 0.03771  | 0.046148 |
| P27PT198  | 0.17231  | -0.08301 | 0.001929 | 0.016397 |
| RAB11     | 0.009866 | -0.16609 | 0.004073 | 0.02308  |
| ADAR1     | -0.32227 | 0.085706 | 0.038004 | 0.046148 |
| CDK1PY15  | -0.18438 | 0.193455 | 0.016377 | 0.039346 |
| BRAFPS445 | -0.07772 | 0.10236  | 0.041817 | 0.047393 |
| CHK1PS296 | 0.03269  | 0.140965 | 0.013136 | 0.038848 |
| CTLA4     | -0.26836 | -0.4763  | 0.048661 | 0.048661 |
| MACC1     | 0.44712  | -0.26626 | 0.02083  | 0.039346 |

Supplementary Table S5-14. Differentially expressed proteins between S241 and G266 hotspot mutations

| Proteins           | Median   |          | <i>p</i> | <i>q</i> |
|--------------------|----------|----------|----------|----------|
|                    | S241     | G266     |          |          |
| CMETPY1235         | -0.05064 | 0.10229  | 0.007363 | 0.015453 |
| DVL3               | 0.458475 | 0.144695 | 0.033508 | 0.033508 |
| EGFRPY1173         | -0.17609 | -0.00924 | 0.011038 | 0.015453 |
| BADPS112           | 0.58112  | 0.20335  | 0.000871 | 0.006097 |
| PKCPANBETAIIPS660  | 0.28134  | -0.21878 | 0.010619 | 0.015453 |
| EPPK1              | 1.96035  | 0.058108 | 0.032139 | 0.033508 |
| THYMIDILATESYNTASE | -0.05064 | 0.10229  | 0.007363 | 0.015453 |

Supplementary Table S5-15. Differentially expressed proteins between C238 and R282 hotspot mutations

| Proteins     | Median   |          | <i>p</i> | <i>q</i> |
|--------------|----------|----------|----------|----------|
|              | C238     | R282     |          |          |
| ERK2         | 0.0742   | -0.63057 | 0.016462 | 0.026247 |
| IGFBP2       | 2.3573   | 1.0886   | 0.019682 | 0.026247 |
| PAXILLIN     | 0.50875  | -0.1373  | 0.026398 | 0.030169 |
| YAPPS127     | 1.08926  | 0.23633  | 0.016708 | 0.026247 |
| FASN         | -0.9988  | 0.31497  | 0.036053 | 0.036053 |
| NRAS         | -0.14978 | 0.043484 | 0.017724 | 0.026247 |
| RICTORPT1135 | 0.24355  | -0.01293 | 0.003843 | 0.026247 |
| DUSP4        | -0.54613 | -0.1447  | 0.008252 | 0.026247 |

Supplementary Table S5-16. Differentially expressed proteins between C238 and Y163 hotspot mutations

| Proteins   | Median   |          | <i>p</i> | <i>q</i> |
|------------|----------|----------|----------|----------|
|            | C238     | Y163     |          |          |
| AMPKALPHA  | 0.230853 | -0.42796 | 0.048328 | 0.049389 |
| BCL2       | -0.78954 | -0.45408 | 0.036562 | 0.049389 |
| CIAP       | 0.18287  | 0.047197 | 0.030348 | 0.049389 |
| DVL3       | 0.444785 | 0.265045 | 0.039912 | 0.049389 |
| EGFR       | -0.30502 | -0.41274 | 0.029068 | 0.049389 |
| EGFRPY1173 | -0.09896 | -0.17253 | 0.02717  | 0.049389 |
| IGFBP2     | 2.3573   | 0.77761  | 0.030432 | 0.049389 |
| JNK2       | -0.12309 | -0.64792 | 0.016082 | 0.049389 |
| STATHMIN   | 0.063106 | -0.06878 | 0.049389 | 0.049389 |
| RICTOR     | 0.330035 | -0.07249 | 0.005529 | 0.049389 |
| PKM2       | 0.230853 | -0.42796 | 0.048328 | 0.049389 |
| CASPASE9   | -0.78954 | -0.45408 | 0.036562 | 0.049389 |

Supplementary Table S5-17. Differentially expressed proteins between C238 and G266 hotspot mutations

| Proteins            | Median   |          | <i>p</i> | <i>q</i> |
|---------------------|----------|----------|----------|----------|
|                     | C238     | G266     |          |          |
| AMPKALPHA           | 0.230853 | -0.39787 | 0.027339 | 0.041203 |
| BCL2                | -0.78954 | -0.37839 | 0.01319  | 0.041203 |
| CMETPY1235          | 0.015889 | 0.10229  | 0.023553 | 0.041203 |
| CIAP                | 0.18287  | -0.11371 | 0.033218 | 0.041203 |
| DVL3                | 0.444785 | 0.144695 | 0.036558 | 0.041203 |
| IGFBP2              | 2.3573   | 1.2069   | 0.03826  | 0.041203 |
| MEK1PS217S221       | 0.722445 | 0.105638 | 0.029733 | 0.041203 |
| YAP                 | 0.376975 | -0.30376 | 0.008335 | 0.041203 |
| YAPPS127            | 1.08926  | -0.11524 | 0.010635 | 0.041203 |
| SCD1                | 0.002338 | 0.113775 | 0.033853 | 0.041203 |
| SETD2               | -0.08249 | 0.093994 | 0.047036 | 0.047036 |
| PKM2                | 0.230853 | -0.39787 | 0.027339 | 0.041203 |
| CASPASE9            | -0.78954 | -0.37839 | 0.01319  | 0.041203 |
| THYMIDILATESYNTHASE | 0.015889 | 0.10229  | 0.023553 | 0.041203 |

Supplementary Table S5-18. Differentially expressed proteins between Y220 and C163 hotspot mutations

| Proteins   | Median   |          | <i>p</i> | <i>q</i> |
|------------|----------|----------|----------|----------|
|            | Y220     | Y163C    |          |          |
| BIM        | 0.330215 | -0.26626 | 0.002066 | 0.015594 |
| CKIT       | -0.1047  | -0.51165 | 0.039706 | 0.047742 |
| CYCLINB1   | 0.126899 | 0.94647  | 0.043174 | 0.047742 |
| EGFR       | -0.29362 | -0.41274 | 0.012021 | 0.04007  |
| EGFRPY1173 | -0.03066 | -0.17253 | 0.002599 | 0.015594 |
| FOXO3A     | 0.046079 | -0.15627 | 0.03722  | 0.047742 |
| HSP70      | 0.490115 | -0.35642 | 0.026268 | 0.047742 |
| IGFBP2     | 2.01475  | 0.77761  | 0.044559 | 0.047742 |
| KU80       | -0.309   | 0.085044 | 0.010772 | 0.04007  |
| MRE11      | 0.259445 | 0.144235 | 0.040244 | 0.047742 |
| MTORPS2448 | 0.308105 | 0.40045  | 0.032162 | 0.047742 |
| NOTCH1     | -0.1198  | -0.40967 | 0.007799 | 0.033424 |
| P27        | -0.05134 | -0.37691 | 0.028776 | 0.047742 |
| PR         | -0.15149 | -0.24385 | 0.037381 | 0.047742 |
| STAT3PY705 | 0.25276  | 0.478415 | 0.049253 | 0.049253 |
| STATHMIN   | 0.081135 | -0.06878 | 0.015722 | 0.045723 |
| BAP1C4     | 0.12993  | 0.34542  | 0.027178 | 0.047742 |
| FASN       | -0.33037 | -1.35115 | 0.016765 | 0.045723 |
| FOXM1      | 0.44873  | 1.061355 | 0.006025 | 0.030125 |
| MYH11      | 0.120999 | -1.01529 | 0.025479 | 0.047742 |
| P27PT198   | 0.026991 | -0.08301 | 0.038441 | 0.047742 |

|                    |          |          |          |          |
|--------------------|----------|----------|----------|----------|
| PDCD4              | 0.72196  | 1.20225  | 0.022517 | 0.047742 |
| PKCPANBETAIIIPS660 | 0.010686 | 0.42061  | 0.034272 | 0.047742 |
| RAB11              | 0.053138 | -0.16609 | 0.002451 | 0.015594 |
| X1433BETA          | 0.138875 | -0.01324 | 0.019947 | 0.047742 |
| PREX1              | -0.27778 | 0.109561 | 0.04673  | 0.048341 |
| MSH2               | -0.03495 | 0.577635 | 0.001673 | 0.015594 |
| MSH6               | -0.01185 | 0.784535 | 0.043882 | 0.047742 |
| MACC1              | 0.330215 | -0.26626 | 0.002066 | 0.015594 |
| PARPAB3            | -0.1047  | -0.51165 | 0.039706 | 0.047742 |

Supplementary Table S5-19. Differentially expressed proteins between Y220 and G266 hotspot mutations

| Proteins           | Median   |         | <i>p</i> | <i>q</i> |
|--------------------|----------|---------|----------|----------|
|                    | Y220     | G266    |          |          |
| CMETPY1235         | 0.010737 | 0.10229 | 0.040581 | 0.040581 |
| GAB2               | 1.29254  | 0.72878 | 0.015643 | 0.040581 |
| THYMIDILATESYNTASE | 0.010737 | 0.10229 | 0.040581 | 0.040581 |

Supplementary Table S5-20. Differentially expressed proteins between G245 and R282 hotspot mutations

| Proteins            | Median   |          | <i>p</i> | <i>q</i> |
|---------------------|----------|----------|----------|----------|
|                     | G245     | R282     |          |          |
| AR                  | -0.38258 | 0.81604  | 0.005583 | 0.017113 |
| CASPASE7CLEAVEDD198 | -0.12926 | -0.90352 | 0.006582 | 0.017113 |
| KU80                | -0.40336 | 0.15987  | 0.040686 | 0.042518 |
| MTOR                | -0.19619 | 0.38439  | 0.001208 | 0.015704 |
| P38MAPK             | 0.025807 | -0.34    | 0.029961 | 0.042518 |
| CD20                | -0.1058  | -0.19592 | 0.037535 | 0.042518 |
| FASN                | -0.99069 | 0.31497  | 0.040498 | 0.042518 |
| TRANSGLUTAMINASE    | -0.09379 | -0.61802 | 0.016579 | 0.03079  |
| ACETYLATUBULINLYS40 | -0.52636 | 0.79168  | 0.03899  | 0.042518 |
| ERCC1               | 0.100575 | -0.06275 | 0.042518 | 0.042518 |
| MYOSINIIIA          | 0.163185 | -0.24695 | 0.01468  | 0.03079  |
| PYGBAB2             | -0.38258 | 0.81604  | 0.005583 | 0.017113 |
| NAPSINA             | -0.12926 | -0.90352 | 0.006582 | 0.017113 |

Supplementary Table S5-21. Differentially expressed proteins between G245 and Y163C hotspot mutations

| Proteins    | Median   |         | <i>p</i> | <i>q</i> |
|-------------|----------|---------|----------|----------|
|             | G245     | Y163C   |          |          |
| ASNS        | -0.02283 | 0.42039 | 0.036382 | 0.045625 |
| ATM         | -0.10862 | 1.03436 | 0.04121  | 0.045625 |
| BAK         | -0.21164 | -0.4763 | 0.006078 | 0.017129 |
| BETACATENIN | -0.23807 | 0.53286 | 0.017735 | 0.034362 |

|                     |          |          |          |          |
|---------------------|----------|----------|----------|----------|
| CMETPY1235          | 0.095022 | -0.02097 | 0.001445 | 0.010695 |
| CHK2                | -0.20692 | 0.33765  | 0.036484 | 0.045625 |
| CYCLINB1            | 0.09756  | 0.94647  | 0.00428  | 0.017129 |
| EGFR                | -0.23001 | -0.41274 | 0.008944 | 0.023105 |
| EGFRPY1173          | 0.018276 | -0.17253 | 0.003192 | 0.016492 |
| JNK2                | -0.18213 | -0.64792 | 0.028857 | 0.044728 |
| KU80                | -0.40336 | 0.085044 | 0.049345 | 0.049345 |
| MTOR                | -0.19619 | 0.126169 | 0.026589 | 0.044728 |
| MTORPS2448          | 0.08185  | 0.40045  | 0.000999 | 0.010695 |
| NOTCH1              | 0.008695 | -0.40967 | 0.004923 | 0.017129 |
| S6PS235S236         | -0.20937 | 0.71961  | 0.038366 | 0.045625 |
| S6PS240S244         | -0.19805 | 0.54102  | 0.026012 | 0.044728 |
| CD20                | -0.1058  | -0.18073 | 0.047278 | 0.048854 |
| FOXM1               | 0.173269 | 1.061355 | 0.001725 | 0.010695 |
| PDCD4               | 0.44393  | 1.20225  | 0.03965  | 0.045625 |
| PKCPANBETAIIPS660   | -0.19937 | 0.42061  | 0.043907 | 0.046935 |
| ERCC1               | 0.100575 | -0.15622 | 0.013175 | 0.029173 |
| MSH2                | -0.965   | 0.577635 | 0.001081 | 0.010695 |
| MSH6                | 0.058597 | 0.784535 | 0.028852 | 0.044728 |
| CDK1PY15            | -0.11739 | 0.193455 | 0.009944 | 0.023713 |
| CHK1PS296           | 0.053112 | 0.140965 | 0.005177 | 0.017129 |
| PYGL                | -0.02283 | 0.42039  | 0.036382 | 0.045625 |
| PYGM                | -0.10862 | 1.03436  | 0.04121  | 0.045625 |
| CTLA4               | -0.21164 | -0.4763  | 0.006078 | 0.017129 |
| KEAP1               | -0.23807 | 0.53286  | 0.017735 | 0.034362 |
| MACC1               | 0.225345 | -0.26626 | 0.0379   | 0.045625 |
| THYMIDILATESYNTHASE | 0.095022 | -0.02097 | 0.001445 | 0.010695 |

Supplementary Table S5-22. Differentially expressed proteins between G245 and G266 hotspot mutations

| Proteins   | Median   |          | <i>p</i> | <i>q</i> |
|------------|----------|----------|----------|----------|
|            | G245     | G266     |          |          |
| SHCPY317   | 0.24244  | 0.105554 | 0.019198 | 0.045465 |
| X4EBP1PT70 | -0.23119 | 0.036577 | 0.043175 | 0.045465 |
| ACVRL1     | 0.106505 | -0.0721  | 0.03391  | 0.045465 |
| ANNEXIN1   | 0.212075 | -0.45296 | 0.025922 | 0.045465 |
| JAB1       | 0.01228  | -0.16196 | 0.037992 | 0.045465 |
| ERCC1      | 0.100575 | -0.06561 | 0.045465 | 0.045465 |



Supplementary Table S5-23. Differentially expressed proteins between R248 and Y163C hotspot mutations

| Proteins            | Median   |          | <i>p</i> | <i>q</i> |
|---------------------|----------|----------|----------|----------|
|                     | R248     | Y163C    |          |          |
| BIM                 | 0.49265  | -0.26626 | 0.002162 | 0.015115 |
| CMETPY1235          | 0.02811  | -0.02097 | 0.009454 | 0.020436 |
| CYCLINB1            | 0.12292  | 0.94647  | 0.00047  | 0.0094   |
| EGFR                | -0.25826 | -0.41274 | 7.05E-05 | 0.002282 |
| EGFRPY1173          | -0.08996 | -0.17253 | 0.003023 | 0.015115 |
| FOXO3A              | 0.010265 | -0.15626 | 0.005322 | 0.016936 |
| GSK3ALPHABETAPS21S9 | -0.5077  | 0.040349 | 0.019902 | 0.031843 |
| HSP70               | 0.24339  | -0.35642 | 0.015551 | 0.027969 |
| IRS1                | -0.21036 | -0.34309 | 0.042644 | 0.04734  |
| JNK2                | -0.35363 | -0.64792 | 0.0472   | 0.04734  |
| MAPKPT202Y204       | 0.57599  | 1.2262   | 0.002477 | 0.015115 |
| MEK1PS217S221       | 0.058121 | 0.51562  | 0.027606 | 0.036877 |
| MTORPS2448          | 0.22987  | 0.40045  | 0.005252 | 0.016936 |
| P27                 | 0.089742 | -0.37691 | 0.000717 | 0.00956  |
| P90RSKPT359S363     | 0.11243  | 0.482535 | 0.024909 | 0.036875 |
| PEA15               | -0.0409  | -0.23836 | 0.044331 | 0.04734  |
| PR                  | -0.20354 | -0.24385 | 0.009707 | 0.020436 |
| RAD51               | -0.12785 | -0.058   | 0.015307 | 0.027969 |
| STATHMIN            | 0.014436 | -0.06878 | 0.016082 | 0.027969 |
| SYK                 | 0.53168  | 1.2806   | 0.027593 | 0.036875 |
| BADPS112            | 0.29972  | 0.62223  | 0.002893 | 0.015115 |
| CD20                | -0.1281  | -0.18073 | 0.042775 | 0.04734  |
| FASN                | -0.92809 | -1.35115 | 0.030844 | 0.03856  |
| FOXM1               | 0.27395  | 1.061355 | 0.005893 | 0.016936 |
| P27PT198            | 0.023803 | -0.08301 | 0.027656 | 0.036875 |
| PDCD4               | 0.62285  | 1.20225  | 0.022032 | 0.033896 |
| PKCPANBETAIIPS660   | 0.073803 | 0.42061  | 0.045139 | 0.04734  |
| RAB11               | -0.03399 | -0.16609 | 0.006351 | 0.016936 |
| RICTOR              | 0.34214  | -0.07249 | 0.005707 | 0.016936 |
| X1433BETA           | 0.094388 | -0.01324 | 0.04734  | 0.04734  |
| MSH2                | 0.26744  | 0.577635 | 0.019799 | 0.031843 |
| CDK1PY15            | -0.06646 | 0.193455 | 0.005478 | 0.016936 |
| BRAFPS445           | -0.03765 | 0.10236  | 0.028966 | 0.037375 |
| CD26                | -0.07333 | -0.18406 | 0.043406 | 0.04734  |
| CHK1PS296           | 0.058095 | 0.140965 | 0.006094 | 0.016936 |
| ERCC5               | -0.1612  | 0.206275 | 0.034829 | 0.04734  |
| P16INK4A            | 1.0044   | 1.65385  | 0.012769 | 0.020358 |
| CTLA4               | -0.26468 | -0.4763  | 0.009654 | 0.020358 |
| MACC1               | 0.49265  | -0.26626 | 0.002162 | 0.015115 |

|                     |         |          |          |          |
|---------------------|---------|----------|----------|----------|
| THYMIDILATESYNTHASE | 0.02811 | -0.02097 | 0.009454 | 0.020436 |
|---------------------|---------|----------|----------|----------|

Supplementary Table S5-24. Differentially expressed proteins between R248 and G266 hotspot mutations

| Proteins            | Median   |          | <i>p</i> | <i>q</i> |
|---------------------|----------|----------|----------|----------|
|                     | R248     | G266     |          |          |
| CMETPY1235          | 0.02811  | 0.10229  | 0.02417  | 0.48726  |
| NOTCH1              | -0.27195 | 0.132825 | 0.009789 | 0.48726  |
| SHCPY317            | 0.19621  | 0.105554 | 0.012788 | 0.48726  |
| YAP                 | 0.1334   | -0.30376 | 0.040687 | 0.48726  |
| YAPPS127            | 0.91375  | -0.11524 | 0.044595 | 0.48726  |
| PDCD4               | 0.62285  | 0.47756  | 0.048726 | 0.48726  |
| EPPK1               | 2.1611   | 0.058108 | 0.037959 | 0.48726  |
| ACVRL1              | 0.075018 | -0.0721  | 0.034278 | 0.48726  |
| ANNEXIN1            | 0.06494  | -0.45296 | 0.036956 | 0.48726  |
| THYMIDILATESYNTHASE | 0.02811  | 0.10229  | 0.02417  | 0.48726  |

Supplementary Table S5-25. Differentially expressed proteins between H179 and Y163C hotspot mutations

| Proteins          | Median   |          | <i>p</i> | <i>q</i> |
|-------------------|----------|----------|----------|----------|
|                   | H179     | Y163C    |          |          |
| AR                | 0.5937   | -0.12727 | 0.038545 | 0.044051 |
| BAK               | -0.32657 | -0.4763  | 0.032467 | 0.041011 |
| BIM               | 0.90307  | -0.26626 | 0.022439 | 0.034961 |
| CMETPY1235        | 0.029756 | -0.02097 | 0.044165 | 0.046085 |
| CDK1              | -0.25127 | 0.107683 | 0.013604 | 0.027208 |
| EGFR              | -0.16522 | -0.41274 | 0.009279 | 0.027208 |
| EGFRPY1173        | 0.061359 | -0.17253 | 0.015925 | 0.0294   |
| MEK1PS217S221     | -0.29033 | 0.51562  | 0.010021 | 0.027208 |
| P27               | 0.1004   | -0.37691 | 0.004737 | 0.027208 |
| P90RSKPT359S363   | 0.21218  | 0.482535 | 0.046573 | 0.046573 |
| CD20              | -0.11195 | -0.18073 | 0.026565 | 0.037504 |
| FASN              | -0.37009 | -1.35115 | 0.004861 | 0.027208 |
| FOXM1             | -0.04458 | 1.061355 | 0.002095 | 0.027208 |
| PDCD4             | 0.63423  | 1.20225  | 0.012384 | 0.027208 |
| PEA15PS116        | 0.18886  | -0.09051 | 0.037672 | 0.044051 |
| PKCPANBETAIIPS660 | -0.35694 | 0.42061  | 0.023307 | 0.034961 |
| X1433BETA         | 0.077331 | -0.01324 | 0.010102 | 0.027208 |
| MSH2              | 0.17576  | 0.577635 | 0.012643 | 0.027208 |
| CDK1PY15          | -0.32891 | 0.193455 | 0.004475 | 0.027208 |
| CHK1PS296         | -0.01989 | 0.140965 | 0.008119 | 0.027208 |
| CTLA4             | -0.32657 | -0.4763  | 0.032467 | 0.041011 |
| MACC1             | 0.90307  | -0.26626 | 0.022439 | 0.034961 |

|                    |          |          |          |          |
|--------------------|----------|----------|----------|----------|
| THYMIDILATESYNTASE | 0.029756 | -0.02097 | 0.044165 | 0.046085 |
| ALPHACATENIN       | -0.25127 | 0.107683 | 0.013604 | 0.027208 |

Supplementary Table S5-26. Differentially expressed proteins between H179 and G266 hotspot mutations

| Proteins      | Median   |          | <i>p</i> | <i>q</i> |
|---------------|----------|----------|----------|----------|
|               | H179     | G266     |          |          |
| CD49B         | -0.15721 | -0.32079 | 0.04625  | 0.04625  |
| NOTCH1        | -0.27173 | 0.132825 | 0.031524 | 0.04625  |
| SMAD4         | 0.010692 | -0.06832 | 0.010117 | 0.04625  |
| EPPK1         | 1.9489   | 0.058108 | 0.036422 | 0.04625  |
| CASPASE3      | -0.08046 | -0.28902 | 0.032372 | 0.04625  |
| SYNAPTOPHYSIN | -0.15721 | -0.32079 | 0.04625  | 0.04625  |

Supplementary Table S5-27. Differentially expressed proteins between H193 and Y163C hotspot mutations

| Proteins           | Median   |          | <i>p</i> | <i>q</i> |
|--------------------|----------|----------|----------|----------|
|                    | H193     | Y163C    |          |          |
| AMPKALPHAPT172     | 0.52521  | -0.54382 | 0.045286 | 0.047691 |
| CYCLINE1           | 1.178    | 0.30059  | 0.015103 | 0.047691 |
| GSK3ALPHABETA      | 0.089741 | -0.11162 | 0.028358 | 0.047691 |
| MAPKPT202Y204      | -0.33694 | 1.2262   | 0.023508 | 0.047691 |
| MEK1PS217S221      | -0.341   | 0.51562  | 0.018556 | 0.047691 |
| MTORPS2448         | 0.14364  | 0.40045  | 0.00846  | 0.047691 |
| P70S6KPT389        | -0.11114 | 0.35094  | 0.038435 | 0.047691 |
| YB1PS102           | -0.1137  | 0.20653  | 0.030319 | 0.047691 |
| BADPS112           | -0.19014 | 0.62223  | 0.024758 | 0.047691 |
| CD20               | -0.12264 | -0.18073 | 0.043008 | 0.047691 |
| P27PT198           | 0.031505 | -0.08301 | 0.013208 | 0.047691 |
| PKCPANBETAIIIPS660 | -0.34803 | 0.42061  | 0.011544 | 0.047691 |
| EPPK1              | -0.13753 | 2.03085  | 0.026281 | 0.047691 |
| PREX1              | -0.33875 | 0.109561 | 0.033556 | 0.047691 |
| ERCC1              | -0.00016 | -0.15622 | 0.046365 | 0.047691 |
| CDK1PY15           | -0.17412 | 0.193455 | 0.00317  | 0.030115 |
| CHK1PS296          | 0.008254 | 0.140965 | 0.001667 | 0.030115 |
| SHP2PY542          | -0.30073 | 0.091871 | 0.047691 | 0.047691 |
| PYGB               | 0.52521  | -0.54382 | 0.045286 | 0.047691 |

Supplementary Table S5-28. Differentially expressed proteins between H193 and G266 hotspot mutations

| Proteins | Median   |          | <i>p</i> | <i>q</i> |
|----------|----------|----------|----------|----------|
|          | H193     | G266     |          |          |
| CYCLIND1 | -0.13621 | 0.074247 | 0.024893 | 0.03384  |

|               |          |          |          |          |
|---------------|----------|----------|----------|----------|
| CYCLINE1      | 1.178    | 0.24591  | 0.005254 | 0.03384  |
| HSP70         | -0.16324 | 0.49093  | 0.034687 | 0.038616 |
| MAPKPT202Y204 | -0.33694 | 0.405115 | 0.038616 | 0.038616 |
| P70S6KPT389   | -0.11114 | 0.52465  | 0.013196 | 0.03384  |
| YB1PS102      | -0.1137  | 0.070812 | 0.02538  | 0.03384  |
| ARAFPS299     | -0.01151 | 0.17907  | 0.010422 | 0.03384  |
| JAB1          | 0.072759 | -0.16196 | 0.018741 | 0.03384  |

Supplementary Table S5-29. Differentially expressed proteins between G275 and Y163C hotspot mutations

| Proteins  | Median   |          | <i>p</i> | <i>q</i> |
|-----------|----------|----------|----------|----------|
|           | G275     | Y163C    |          |          |
| BIM       | 0.567545 | -0.26626 | 0.001212 | 0.010908 |
| CRAF      | -0.09872 | 0.053441 | 0.041347 | 0.043779 |
| EGFR      | -0.15385 | -0.41274 | 0.002025 | 0.01215  |
| MRE11     | 0.29776  | 0.144235 | 0.02785  | 0.035807 |
| NOTCH1    | -0.13875 | -0.40967 | 0.012649 | 0.020698 |
| P27       | 0.320785 | -0.37691 | 0.009917 | 0.020698 |
| PEA15     | 0.38933  | -0.23836 | 0.011279 | 0.020698 |
| SYK       | 0.13573  | 1.2806   | 0.020158 | 0.030237 |
| BAP1C4    | 0.097007 | 0.34542  | 0.01246  | 0.020698 |
| FOXM1     | 0.100945 | 1.061355 | 0.006535 | 0.016804 |
| P27PT198  | 0.105484 | -0.08301 | 0.005269 | 0.015807 |
| PDCD4     | 0.47762  | 1.20225  | 0.044784 | 0.044784 |
| PDK1      | -0.10566 | 0.032754 | 0.023672 | 0.032777 |
| CDK1PY15  | -0.14936 | 0.193455 | 0.004134 | 0.014882 |
| BCL2A1    | 0.344535 | 0.029144 | 0.039373 | 0.043779 |
| CHK1PS296 | 0.027779 | 0.140965 | 0.003369 | 0.014882 |
| CTLA4     | -0.21414 | -0.4763  | 0.034453 | 0.041344 |
| MACC1     | 0.567545 | -0.26626 | 0.001212 | 0.010908 |

Supplementary Table S5-30. Differentially expressed proteins between G275 and G266 hotspot mutations

| Proteins | Median   |         | <i>p</i> |
|----------|----------|---------|----------|
|          | G275     | G266    |          |
| CYCLINE1 | 1.117055 | 0.24591 | 0.033095 |

Supplementary Table S5-31. Differentially expressed proteins between Y234 and Y163C hotspot mutations

| Proteins           | Median   |          | <i>p</i> | <i>q</i> |
|--------------------|----------|----------|----------|----------|
|                    | Y234     | Y163C    |          |          |
| CJUNPS73           | -0.0384  | 0.34139  | 0.019647 | 0.037067 |
| CMETPY1235         | 0.066738 | -0.02097 | 0.044365 | 0.045935 |
| CYCLINB1           | -0.05087 | 0.94647  | 0.004928 | 0.037067 |
| EGFR               | -0.08406 | -0.41274 | 0.023055 | 0.037067 |
| EGFRPY1068         | -0.32234 | 0.037959 | 0.041258 | 0.045935 |
| HER3PY1289         | -0.17101 | -0.04832 | 0.045935 | 0.045935 |
| JNK2               | -0.07367 | -0.64792 | 0.011954 | 0.037067 |
| KU80               | -0.2707  | 0.085044 | 0.011873 | 0.037067 |
| FOXMI              | -0.01408 | 1.061355 | 0.001622 | 0.025952 |
| RICTOR             | 0.59617  | -0.07249 | 0.030524 | 0.044399 |
| CDK1PY15           | -0.19901 | 0.193455 | 0.014908 | 0.037067 |
| CD26               | -0.09618 | -0.18406 | 0.023167 | 0.037067 |
| CHK1PS296          | 0.009367 | 0.140965 | 0.015566 | 0.037067 |
| SHP2PY542          | -0.26126 | 0.091871 | 0.043409 | 0.045935 |
| NRF2               | -0.0384  | 0.34139  | 0.019647 | 0.037067 |
| THYMIDILATESYNTASE | 0.066738 | -0.02097 | 0.044365 | 0.045935 |

Supplementary Table S5-32. Differentially expressed proteins between Y234 and G266 hotspot mutations

| Proteins   | Median   |          | <i>p</i> | <i>q</i> |
|------------|----------|----------|----------|----------|
|            | Y234     | G266     |          |          |
| EGFRPY1068 | -0.32234 | -0.09865 | 0.048485 | 0.048485 |
| IGFBP2     | 0.42483  | 1.2069   | 0.037945 | 0.045534 |
| PAI1       | -0.51274 | 0.14914  | 0.024481 | 0.037674 |
| RAD51      | -0.23173 | -0.00242 | 0.025116 | 0.037674 |
| STAT5ALPHA | 0.74527  | 0.201825 | 0.02331  | 0.037674 |
| ACVRL1     | 0.16479  | -0.0721  | 0.011781 | 0.037674 |
